# Supplementary material
Source: ML conference proceedings conference paper supplement (https://openreview.net/forum?id=SnzUFwLj5lq)
Supplement: supplementary_material [file attachment]

|                                                                                  |                  |                                                                                     |                 |                                                                                     |                |
|----------------------------------------------------------------------------------|------------------|-------------------------------------------------------------------------------------|-----------------|-------------------------------------------------------------------------------------|----------------|
|   | 0: road          |   | 7: traffic sign |   | 13: car        |
|  | 1: sidewalk      |  | 8: vegetation   |  | 14: truck      |
|  | 2: building      |  | 9: terrain      |  | 15: bus        |
|  | 3: wall          |  | 10: sky         |  | 16: train      |
|  | 4: fence         |  | 11: person      |  | 17: motorcycle |
|  | 5: pole          |  | 12: rider       |  | 18: bicycle    |
|  | 6: traffic light |                                                                                     |                 |                                                                                     |                |
