# Supplementary material
Source: ML conference proceedings conference paper supplement (https://openreview.net/forum?id=SnzUFwLj5lq)
Supplement: supplementary_material [file attachment]

|                                                                                  |             |                                                                                     |                  |                                                                                     |                |
|----------------------------------------------------------------------------------|-------------|-------------------------------------------------------------------------------------|------------------|-------------------------------------------------------------------------------------|----------------|
|   | 0: road     |   | 6: traffic light |   | 12: rider      |
|  | 1: sidewalk |  | 7: traffic sign  |  | 13: car        |
|  | 2: building |  | 8: vegetation    |  | 14: truck      |
|  | 3: wall     |  | 9: terrain       |  | 15: train      |
|  | 4: fence    |  | 10: sky          |  | 16: motorcycle |
|  | 5: pole     |  | 11: person       |  | 17: bicycle    |
