# Supplementary material
Source: ML conference proceedings conference paper supplement (https://openreview.net/forum?id=SnzUFwLj5lq)

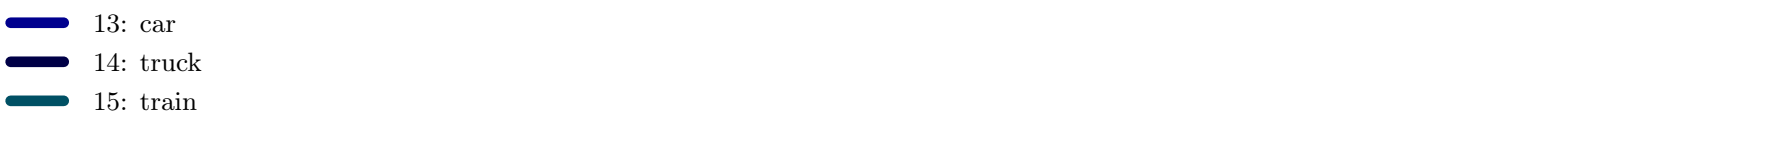

13: car

14: truck

15: train

Supplement: supplementary_material [file attachment]

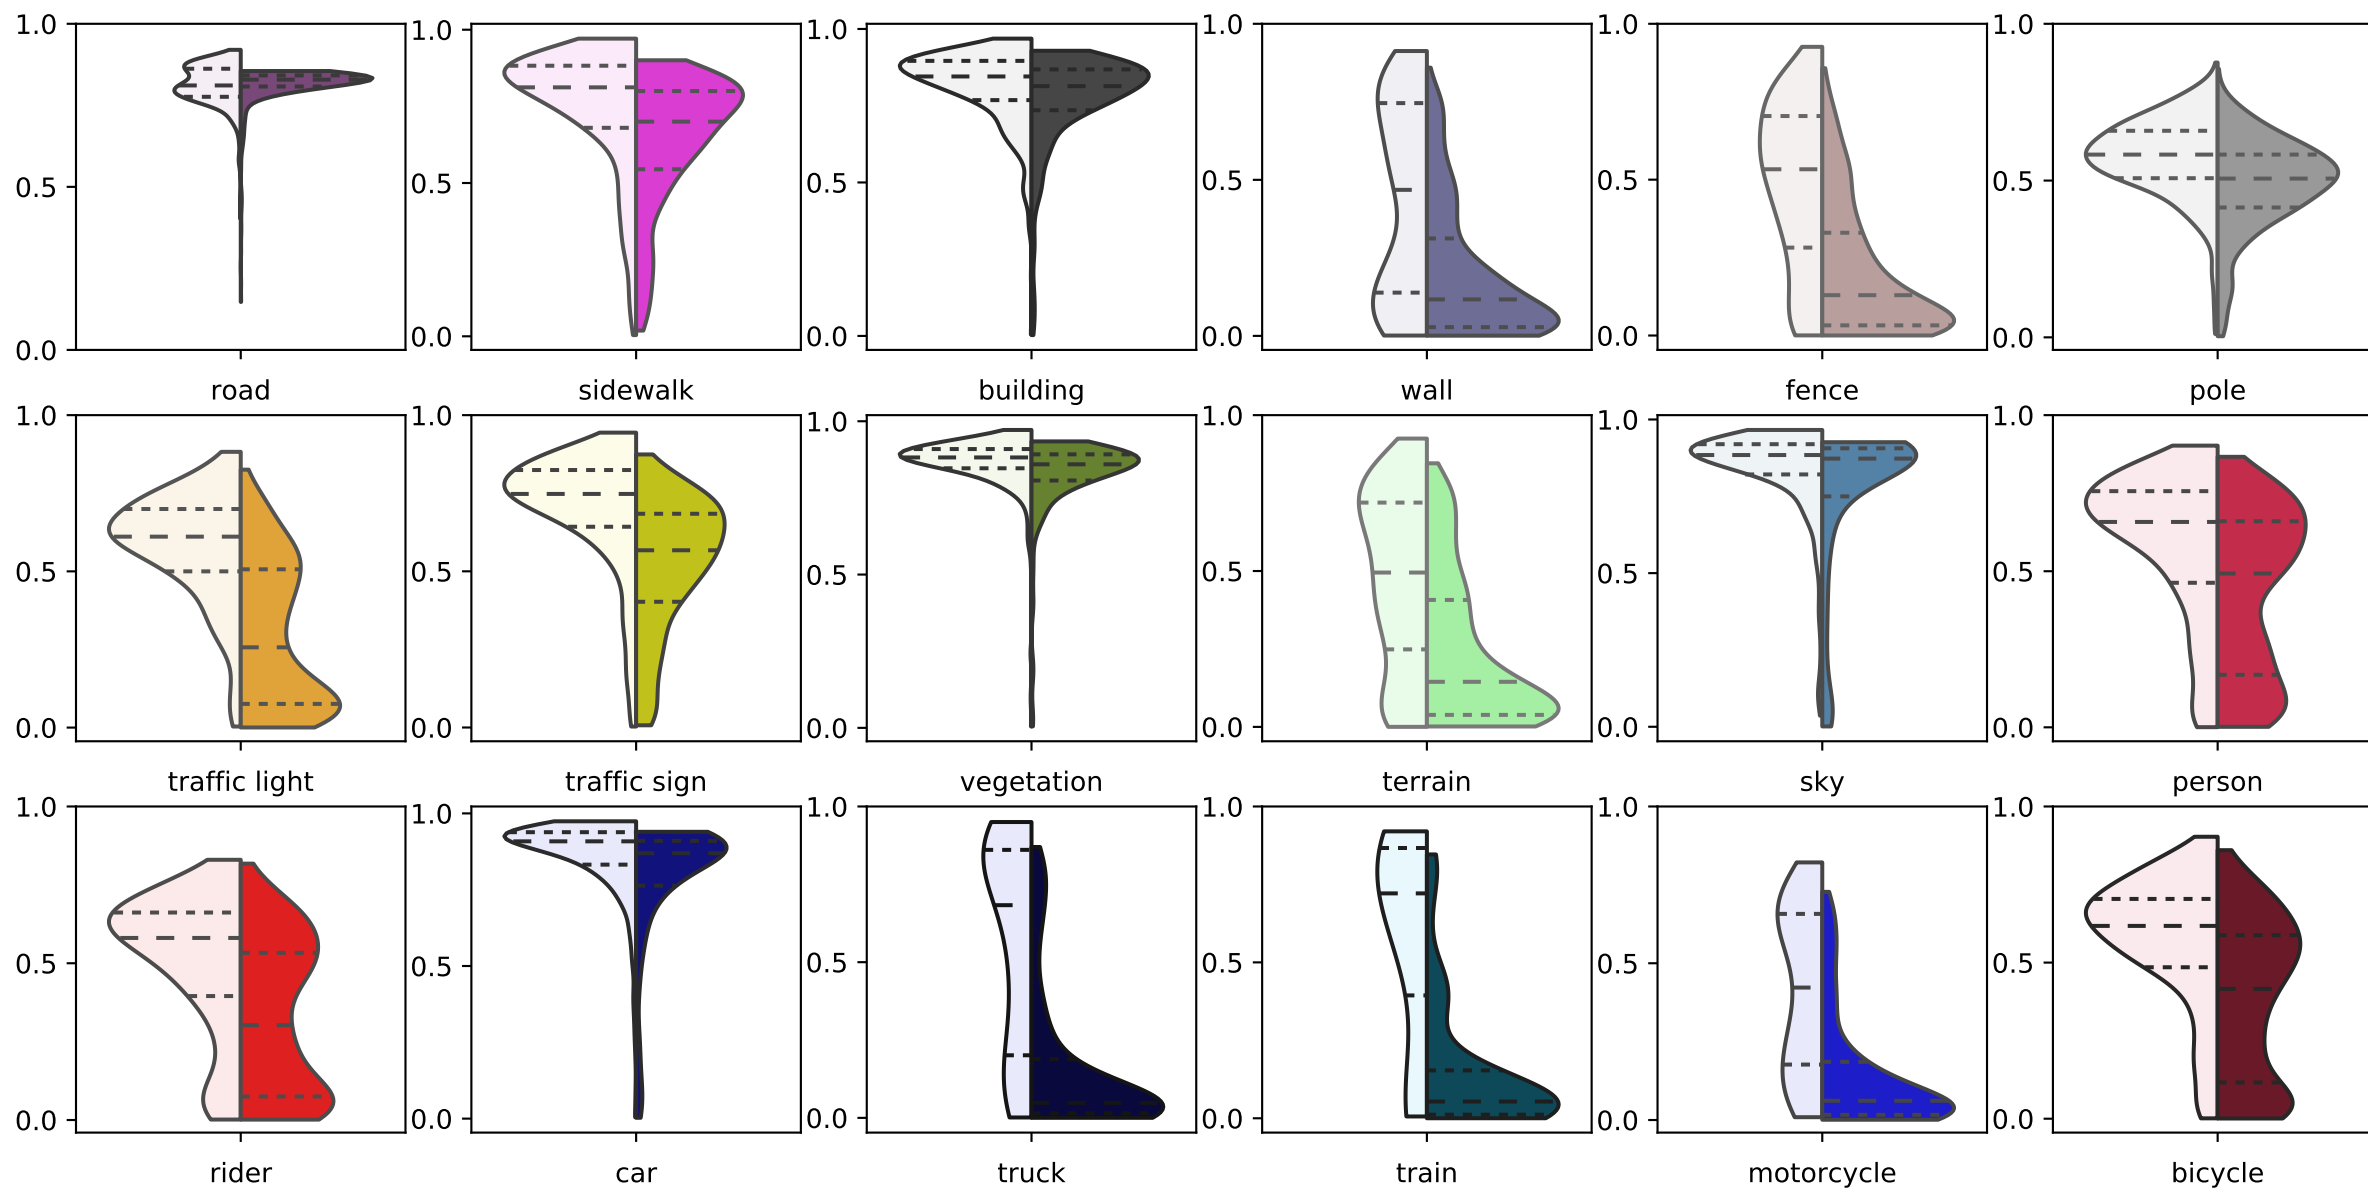

Supplement: supplementary_material [file attachment]

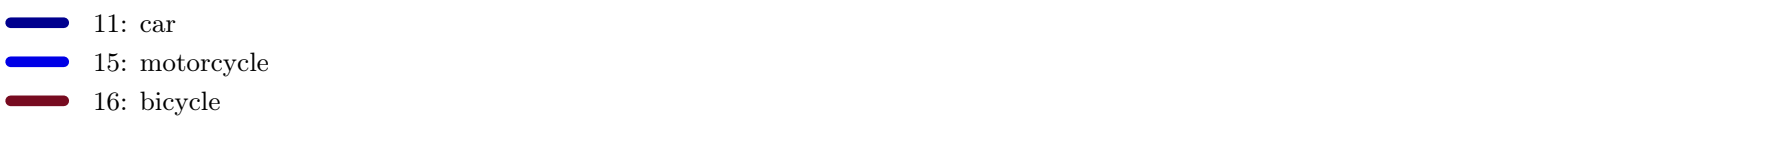

Supplement: supplementary_material [file attachment]

Relative frequency in the embedding space

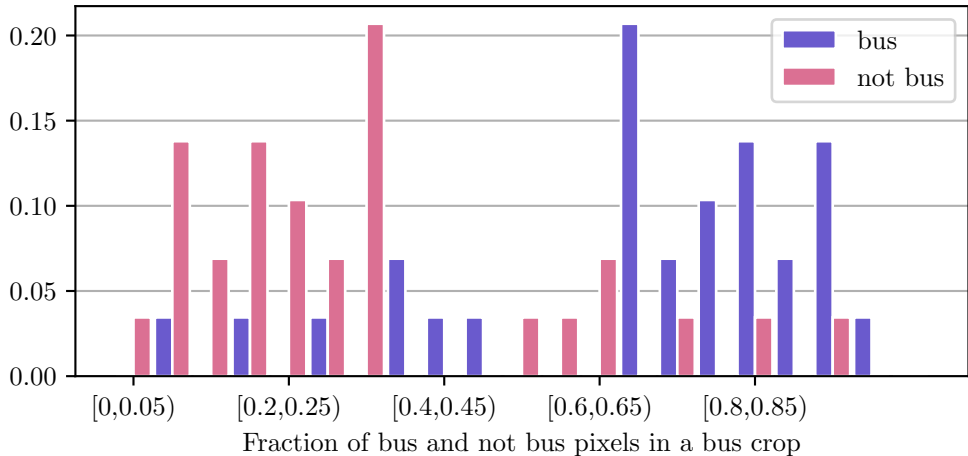

Supplement: supplementary_material [file attachment]

$R^2$ : 80.81%, AuROC: 85.64%

Predicted IoU via neural network

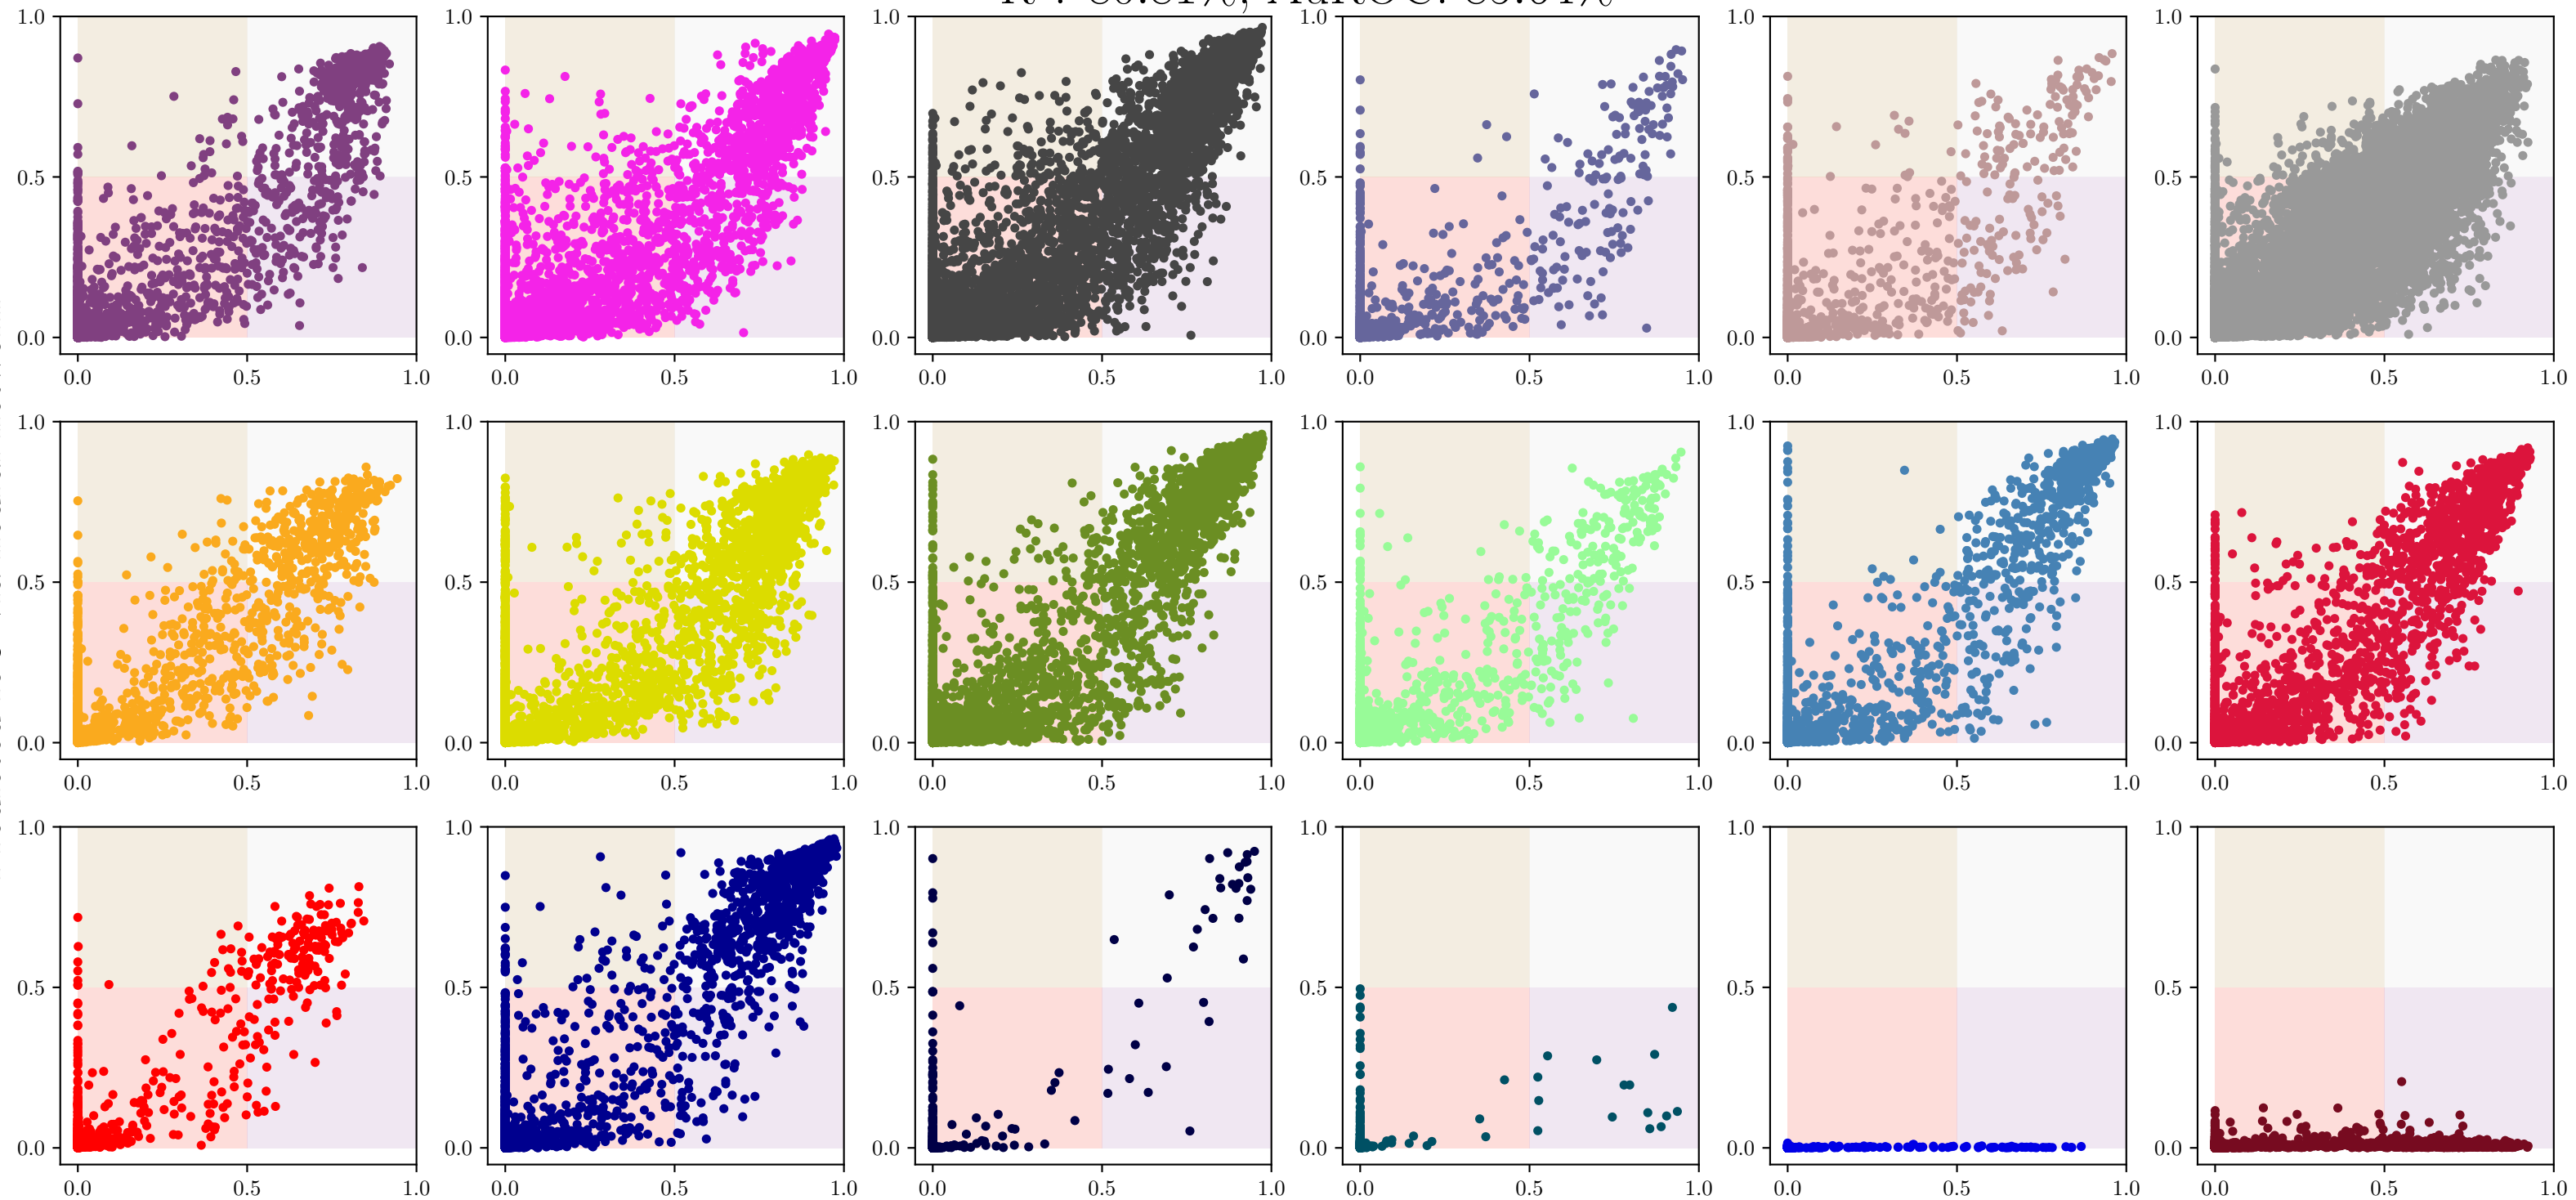

True IoU

Supplement: supplementary_material [file attachment]

Relative frequency in the embedding space

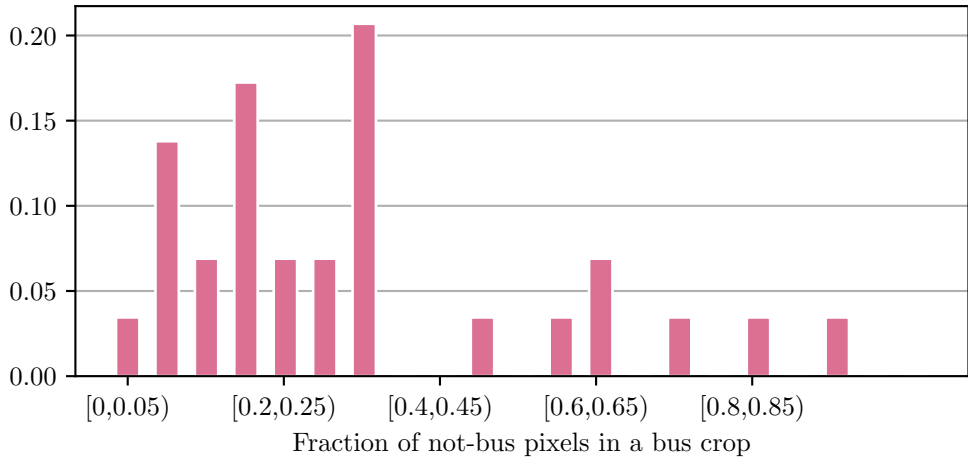

Supplement: supplementary_material [file attachment]

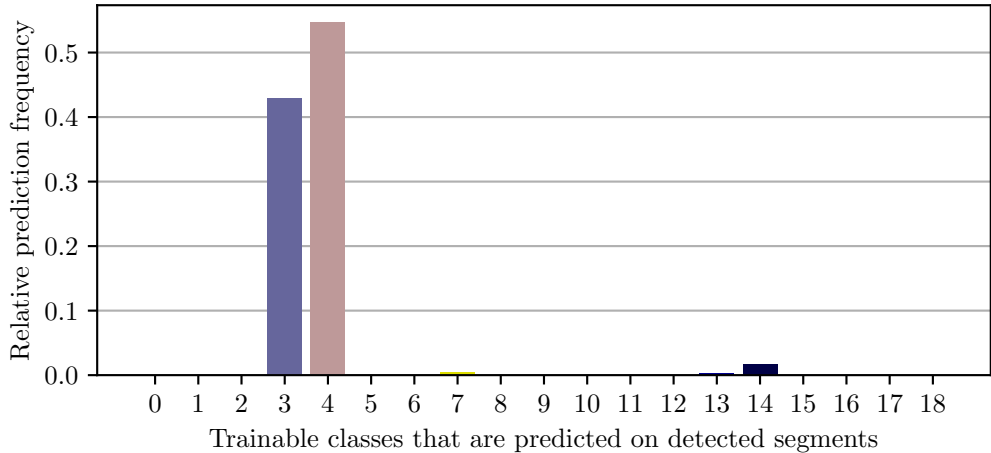

Supplement: supplementary_material [file attachment]

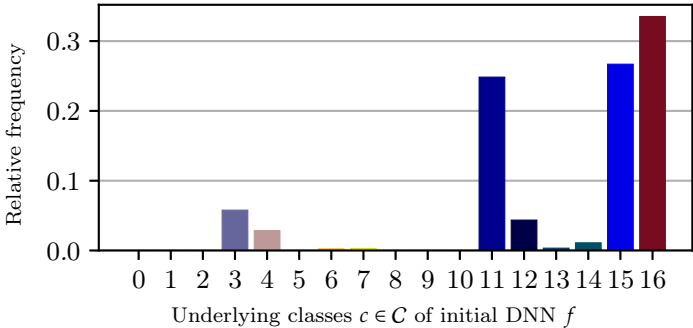

Supplement: supplementary_material [file attachment]

Relative frequency in the ground truth

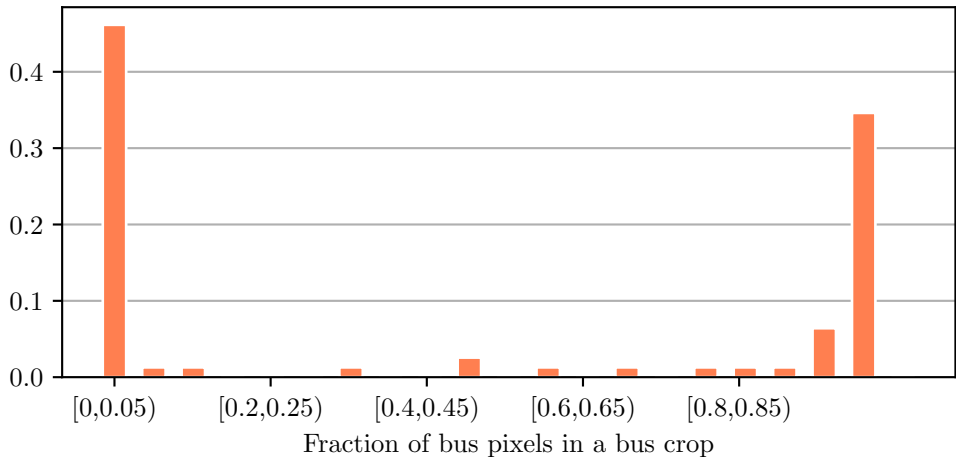

Supplement: supplementary_material [file attachment]

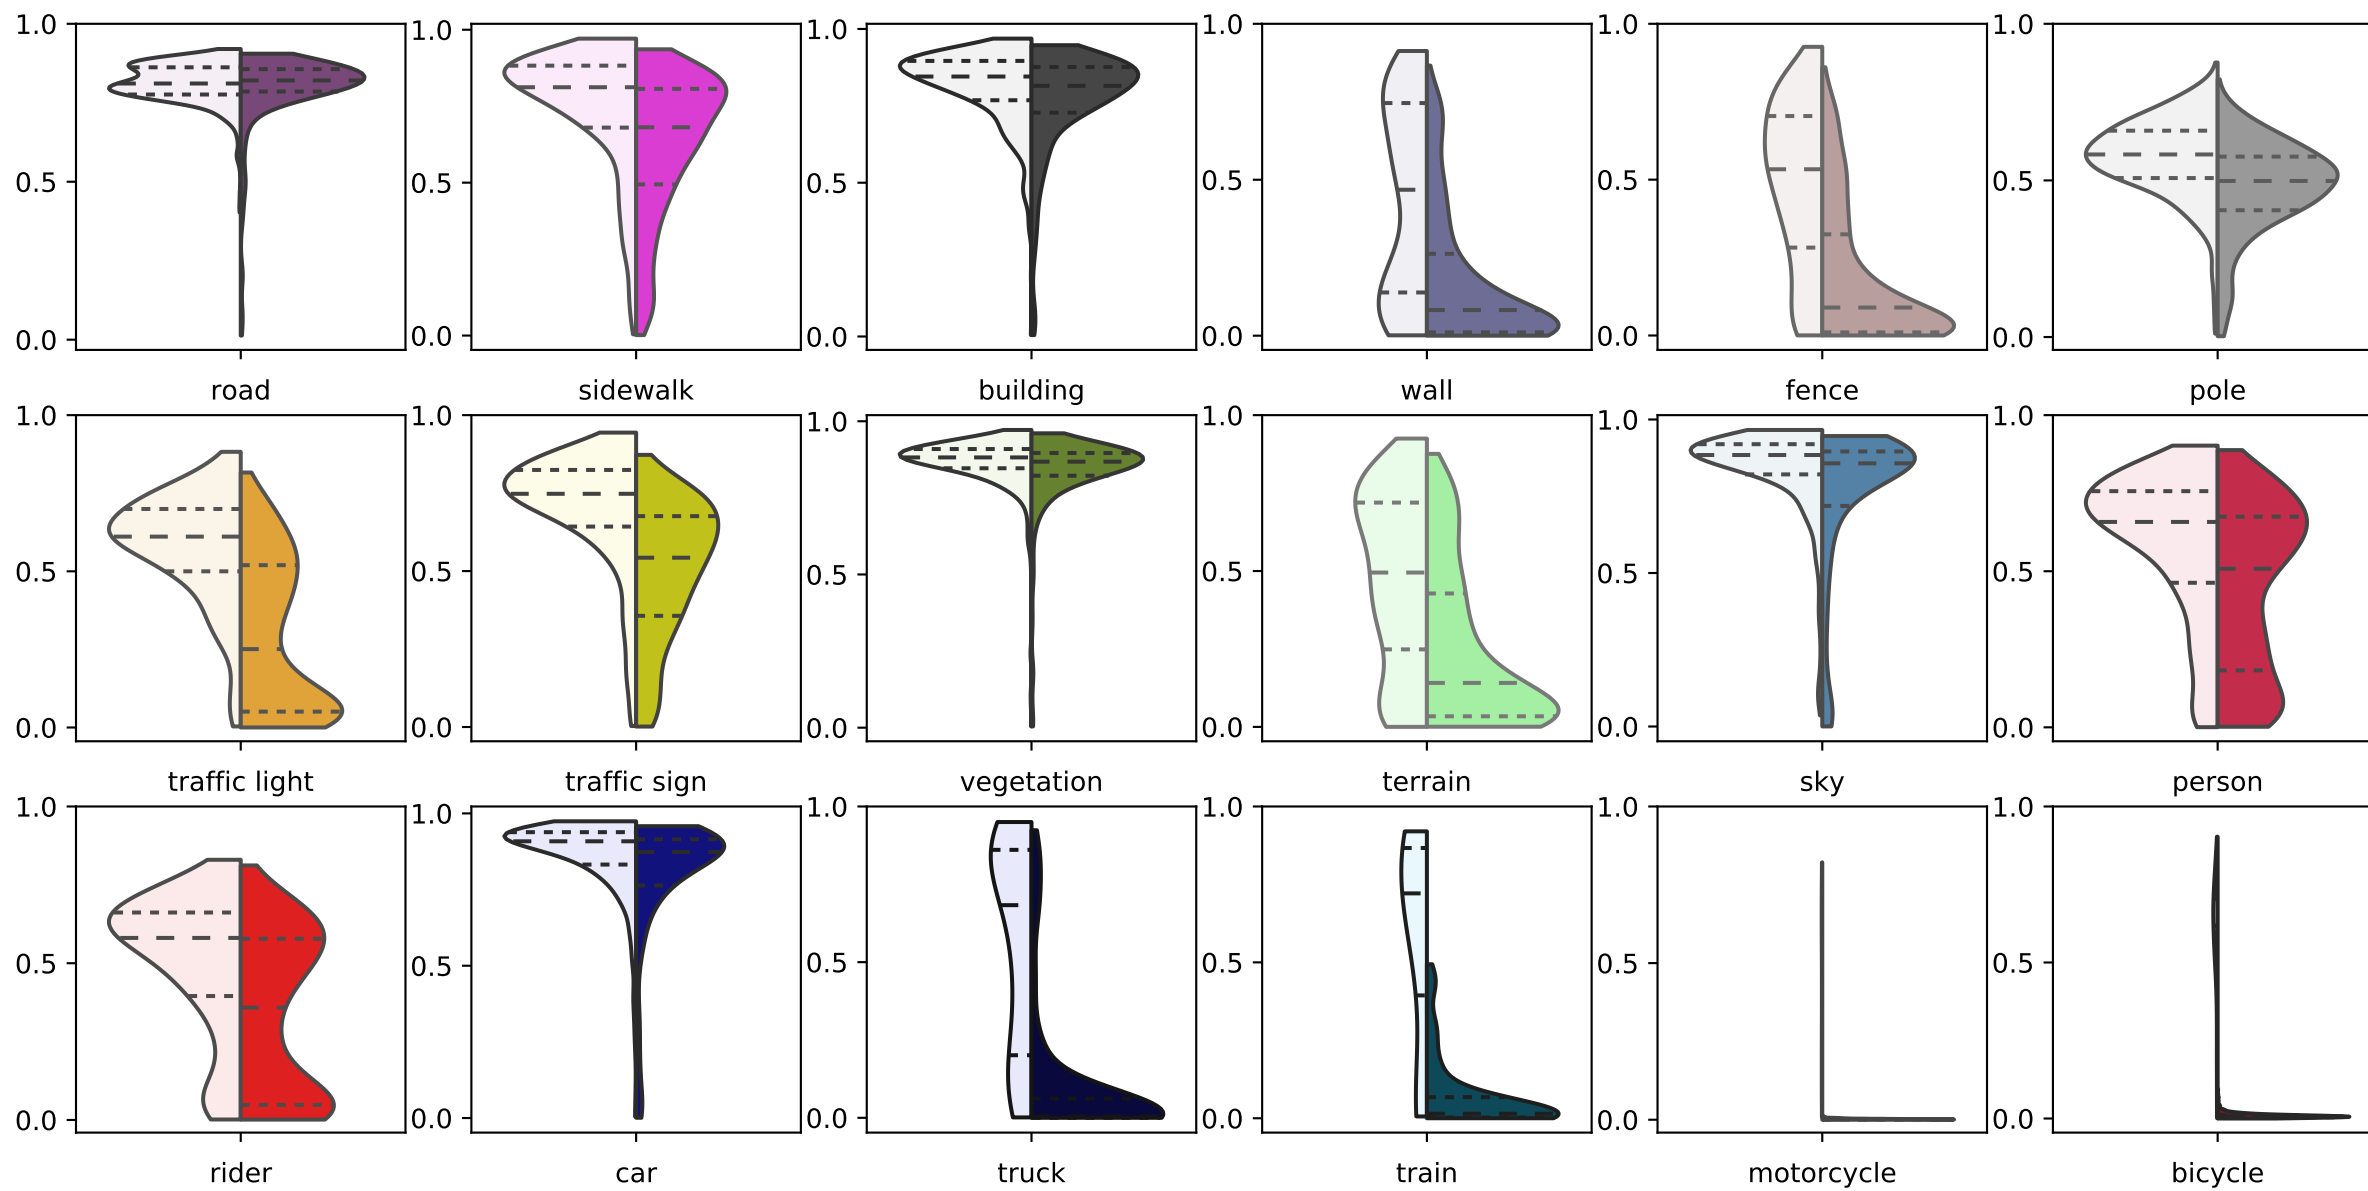

Supplement: supplementary_material [file attachment]

Relative frequency in the embedding space

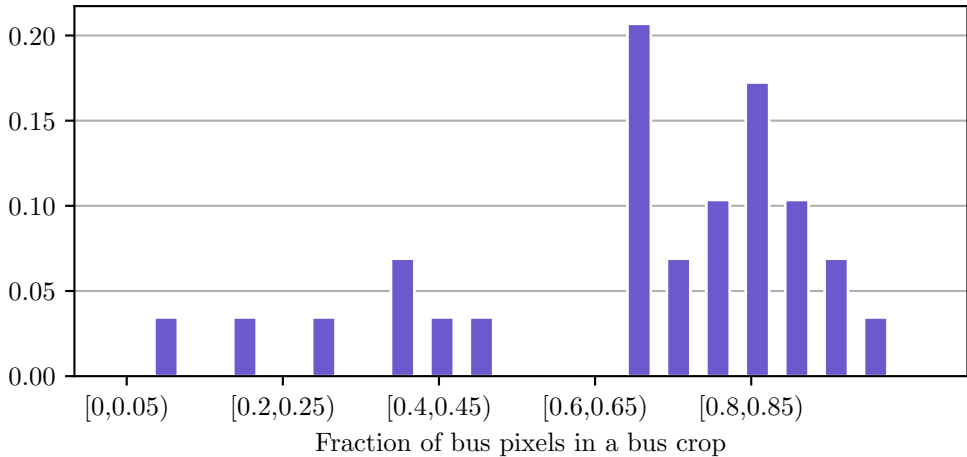

Supplement: supplementary_material [file attachment]

$R^2$ : 82.94%, AuROC: 86.71%

Predicted IoU via gradient boosting

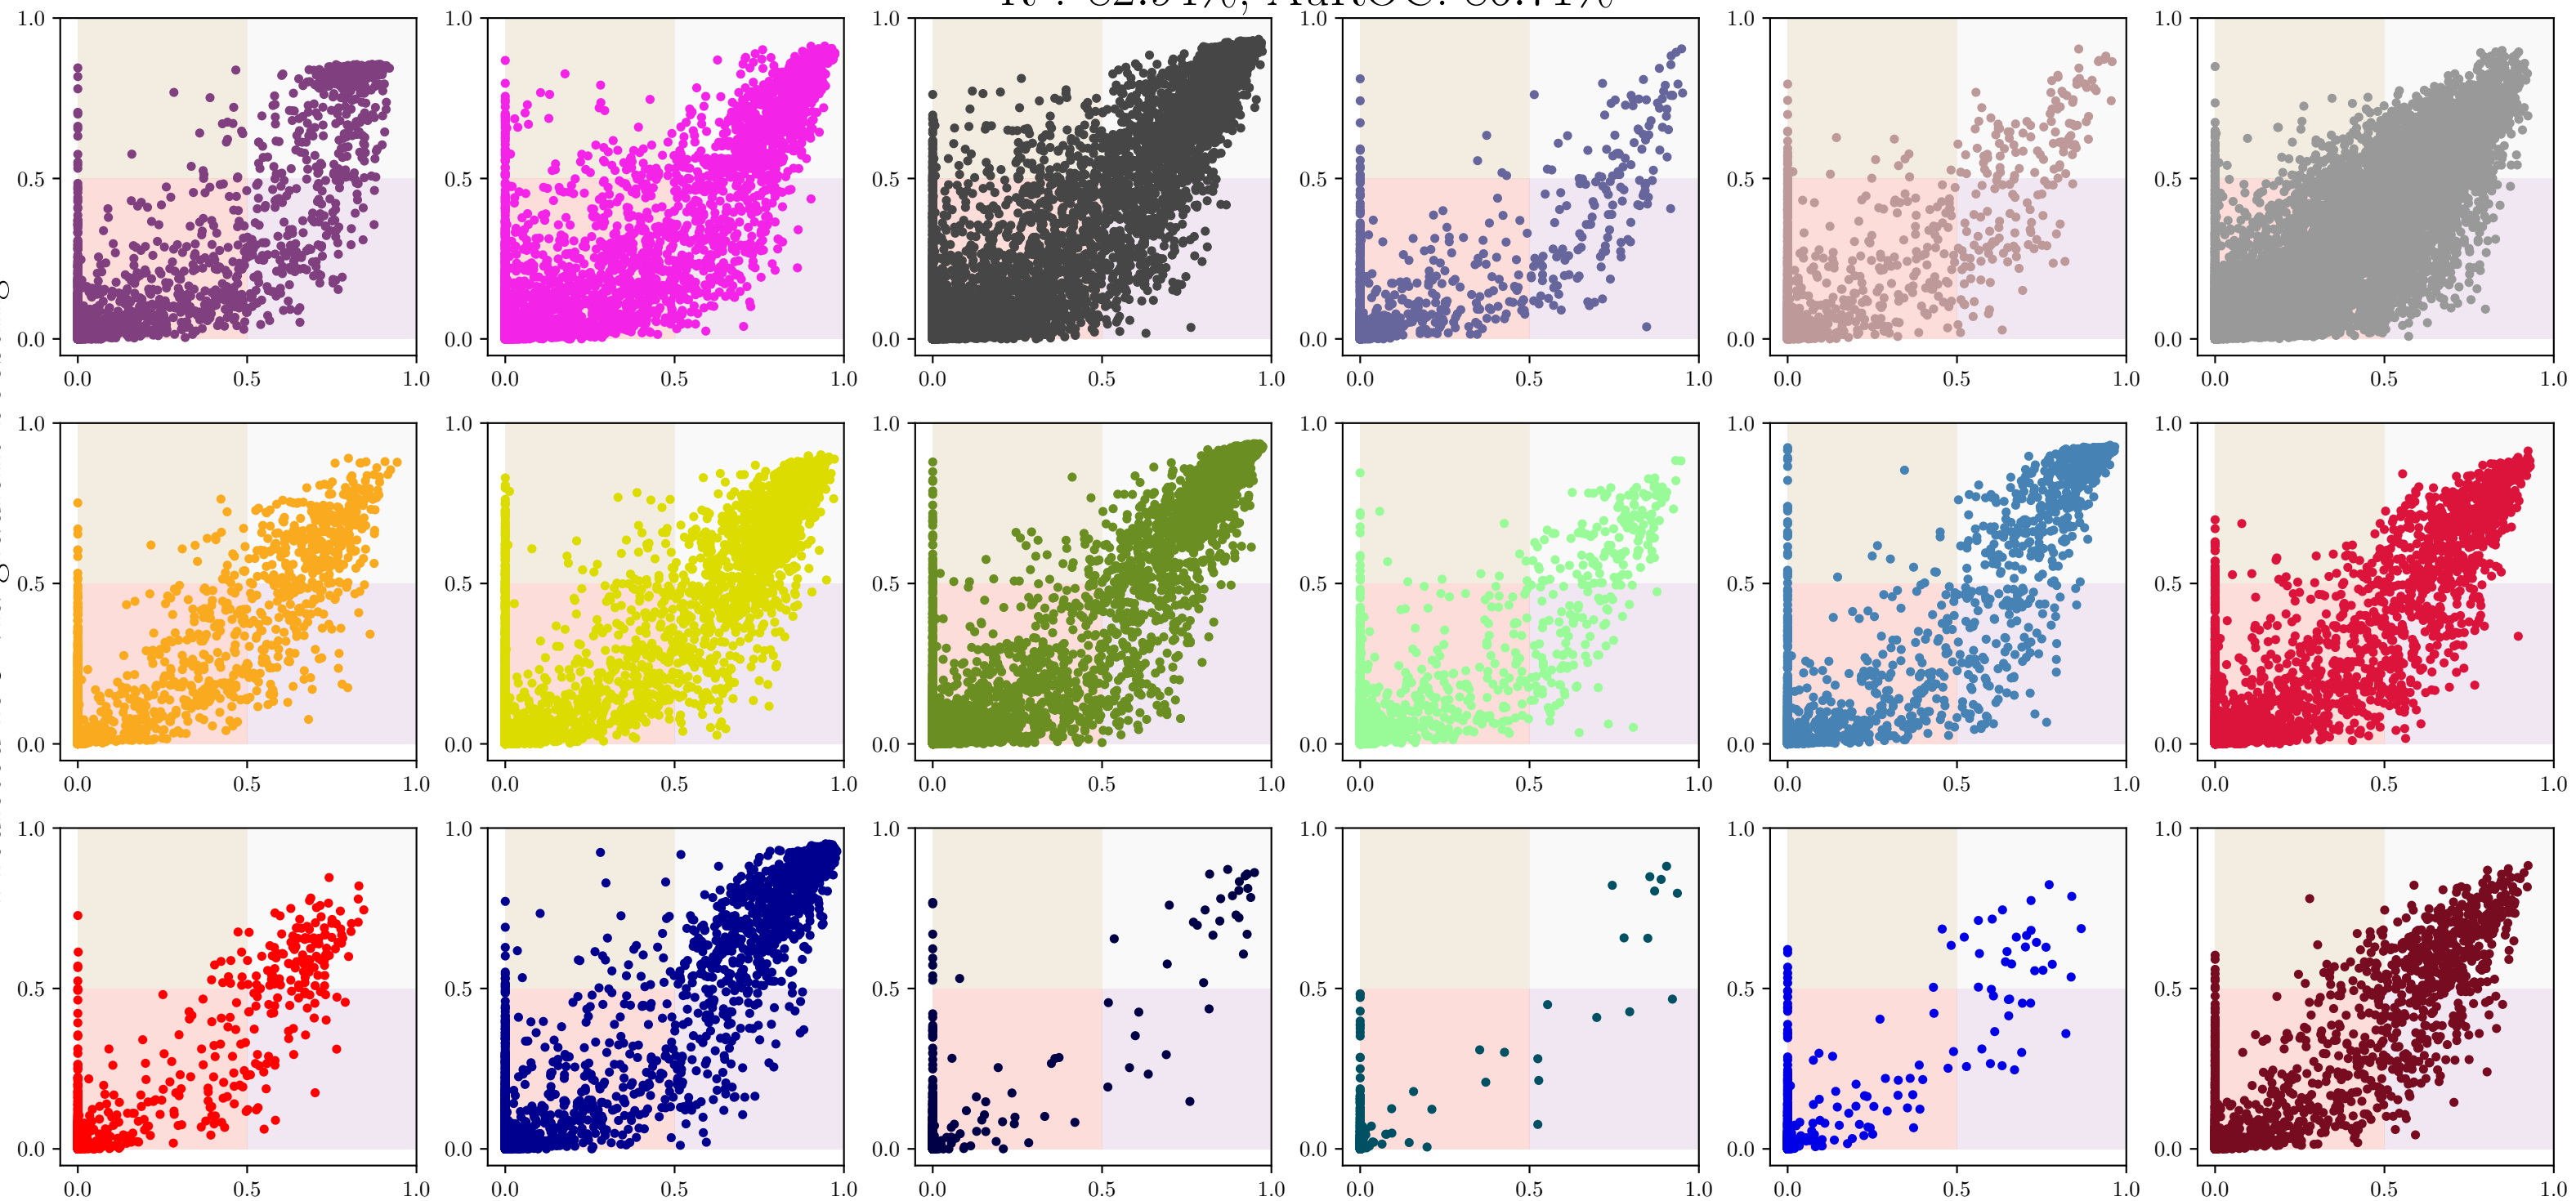

True IoU

Supplement: supplementary_material [file attachment]

Relative frequency

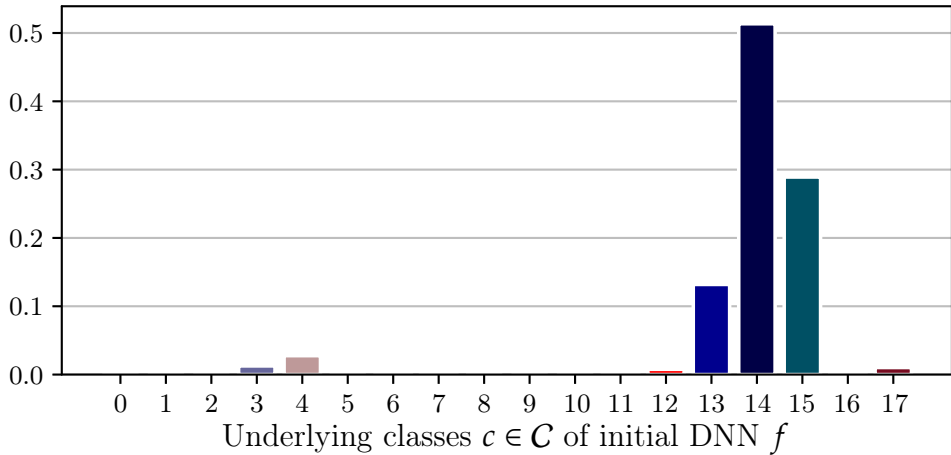

Supplement: supplementary_material [file attachment]

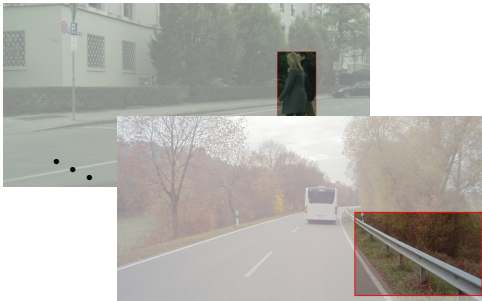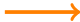

Feature  
Extraction

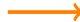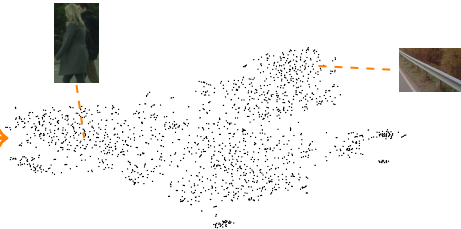

Supplement: supplementary_material [file attachment]
